# Supplementary material
Source: publisher figshare collection journal article supplement (https://acs.figshare.com/ndownloader/files/9521164)
Supplement: Supplementary file 1 [file 9521164]

## Supporting Information

### **Cu(I) Coordination Polymers as the Green Heterogeneous Catalysts for Direct C-H Bonds Activation of Arylalkanes to Ketones in Water with Spatial Confinement Effect**

*Xiaolu Wang,<sup>†,‡</sup> Mengjia Liu,<sup>†,‡</sup> Yuqing Wang,<sup>†</sup> Hongyan Fan,<sup>†</sup> Jie Wu,<sup>\*,†</sup> Chao  
Huang,<sup>\*,‡</sup> Hongwei Hou<sup>\*,†</sup>*

<sup>†</sup>College of Chemistry and Molecular Engineering, Zhengzhou University, Zhengzhou  
450001, P. R. China.

<sup>‡</sup>Center for Advanced Materials Research, Zhongyuan University of Technology,  
Zhengzhou 450007, P. R. China.

#### **Contents**

|                                                                                         |            |
|-----------------------------------------------------------------------------------------|------------|
| <b>1. General Method.....</b>                                                           | <b>S2</b>  |
| <b>2. Synthesis.....</b>                                                                | <b>S3</b>  |
| <b>3. Crystal Data Collection and Refinement.....</b>                                   | <b>S5</b>  |
| <b>4. Additional structure figures and characterizations of Cu-complexes.....</b>       | <b>S8</b>  |
| <b>5. Spectral copies of <sup>1</sup>H NMR of compounds obtained in this study.....</b> | <b>S11</b> |
| <b>6. References.....</b>                                                               | <b>S14</b> |

**1. General Method.** All reagents and solvents were commercially available and used as received without further purification.  $^1\text{H}$  spectra were obtained with Bruker Avance-400 spectrometers. Chemical shifts are reported as  $\delta$  (ppm) downfield with respect to an internal standard of tetramethylsilane (TMS). FT-IR spectra were recorded on a Bruker-ALPHA spectrophotometer with KBr pellets in  $400\text{--}4000\text{ cm}^{-1}$  region. Powder X-ray diffraction (PXRD) patterns were recorded using Cu  $\text{K}\alpha 1$  radiation on a PANalyticalX'Pert PRO diffractometer. Atomic absorption spectrum (AAS) was performed on a Z28000 graphite-oven atomic absorption Spectrophotometer.

## 2. Synthesis

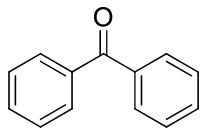

**Benzophenone.** The concentrate was purified by silica gel column chromatography using petroleum ether/ethyl acetate = 10/1 as developing solvent to obtain a colorless solid 90mg (99%). This compound had been reported.<sup>1</sup> <sup>1</sup>H NMR (400 MHz, CDCl<sub>3</sub>)  $\delta$ : 7.85-7.76 (m, 1H), 7.64-7.55 (m, 1H), 7.48 (dd,  $J$  = 8.4, 7.0 Hz, 1H) ppm.

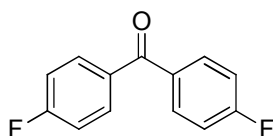

**bis(4-fluorophenyl)methanone.** The concentrate was purified by silica gel column chromatography using petroleum ether/ethyl acetate = 10/1 as developing solvent to obtain a colorless solid 101mg (93%). This compound had been reported.<sup>2</sup> <sup>1</sup>H NMR (400 MHz, CDCl<sub>3</sub>)  $\delta$ : 7.85-7.79 (m, 1H), 7.21-7.13 (m, 1H) ppm.

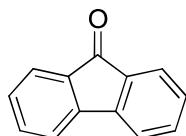

**9-Fluorenone.** The concentrate was purified by silica gel column chromatography using petroleum ether/ethyl acetate = 10/1 as developing solvent to obtain a yellow solid 88mg (98%). This compound had been reported.<sup>1</sup> <sup>1</sup>H NMR (400 MHz, CDCl<sub>3</sub>)  $\delta$ : 7.63 (dt,  $J$  = 7.4, 0.9 Hz, 1H), 7.52-7.42 (m, 2H), 7.27 (td,  $J$  = 7.1, 1.6 Hz, 1H) ppm.

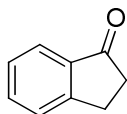

**1-Indanone.** The concentrate was purified by silica gel column chromatography using petroleum ether/ethyl acetate = 10/1 as developing solvent to obtain a white solid 62 mg (96%). This

compound had been reported.<sup>1</sup> <sup>1</sup>H NMR (400 MHz, CDCl<sub>3</sub>)  $\delta$ : 7.76 (d,  $J$  = 7.7 Hz, 1H), 7.59 (td,  $J$  = 7.5, 1.2 Hz, 1H), 7.51-7.46 (m, 1H), 7.40-7.34 (m, 1H), 3.17-3.13 (m, 2H), 2.72-2.67 (m, 2H) ppm.

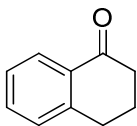

**3,4-Dihydronaphthalen-1(2H)-one.** The concentrate was purified by silica gel column chromatography using petroleum ether/ethyl acetate = 10/1 as developing solvent to obtain light yellow liquid 71 mg (98%). This compound had been reported.<sup>1</sup> <sup>1</sup>H NMR (400 MHz, CDCl<sub>3</sub>)  $\delta$ : 8.01 (d,  $J$  = 7.6 Hz, 1H), 7.45 (t,  $J$  = 7.4 Hz, 1H), 7.30 (t,  $J$  = 7.4 Hz, 1H), 7.23 (d,  $J$  = 7.6 Hz, 1H), 2.98 (t,  $J$  = 6.0 Hz, 2H), 2.63 (t,  $J$  = 6.4 Hz, 2H), 2.17-2.09 (m, 2H) ppm.

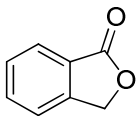

**isobenzofuran-1(3H)-one.** The concentrate was purified by silica gel column chromatography using petroleum ether/ethyl acetate = 10/1 as developing solvent to obtain light yellow liquid 58 mg (88%). This compound had been reported.<sup>1</sup> <sup>1</sup>H NMR (400 MHz, CDCl<sub>3</sub>)  $\delta$ : 7.92 (d,  $J$  = 7.7 Hz, 1H), 7.79-7.61 (m, 1H), 7.61-7.41 (m, 2H), 5.33 (s, 2H) ppm.

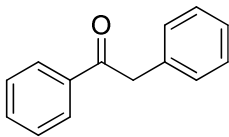

**1,2-diphenylethanone.** The concentrate was purified by silica gel column chromatography using petroleum ether/ethyl acetate = 10/1 as developing solvent to obtain light yellow liquid 98 mg (72%). This compound had been reported.<sup>3</sup> <sup>1</sup>H NMR (400 MHz, CDCl<sub>3</sub>)  $\delta$ : 8.05-7.94 (m, 2H), 7.62-7.42 (m, 4H), 7.39-7.18 (m, 4H), 4.29 (s, 2H) ppm.

### 3. Crystal Data Collection and Refinement. Crystal Data Collection and

**Refinement.** The data of the **1-3** were collected on a Rigaku Saturn 724 CCD diffractometer

(Mo-K $\alpha$ ,  $\lambda$  = 0.71073 Å) at temperature of 20  $\pm$  1 °C. Absorption corrections were applied by

using numerical program. The data were corrected for Lorentz and polarization effects. The

structures were solved by direct methods and refined with a full-matrix least-squares technique

based on  $F^2$  with the SHELXL-97 crystallographic software package.<sup>4</sup> The hydrogen atoms were

placed at calculated positions and refined as riding atoms with isotropic displacement parameters.

Crystallographic data for **1-3** have been deposited at the Cambridge Crystallographic Data Centre

with CCDC reference numbers 988513, 988512, and 1565786.

**Table S1.** Crystallographic data and structure refinement details for complex **1-3**.

| Complex                                   | <b>1</b>                                                         | <b>2</b>                                                          | <b>3</b>                                                          |
|-------------------------------------------|------------------------------------------------------------------|-------------------------------------------------------------------|-------------------------------------------------------------------|
| Formula                                   | C <sub>24</sub> H <sub>18</sub> CuIn <sub>6</sub> O <sub>3</sub> | C <sub>26</sub> H <sub>21</sub> BrCuN <sub>7</sub> O <sub>3</sub> | C <sub>24</sub> H <sub>18</sub> CuClN <sub>6</sub> O <sub>3</sub> |
| $F_w$                                     | 628.88                                                           | 622.95                                                            | 537.43 g                                                          |
| Temp. (K)                                 | 293(2)                                                           | 293(2)                                                            | 293(2)                                                            |
| Wavelength (Å)                            | 0.71073                                                          | 0.71073                                                           | 0.71073                                                           |
| Crystal system                            | monoclinic                                                       | Triclinic                                                         | orthorhombic                                                      |
| Space group                               | <i>C2/c</i>                                                      | <i>P</i> $\bar{1}$                                                | <i>Pbca</i>                                                       |
| a (Å)                                     | 32.013(6)                                                        | 9.002 (18)                                                        | 6.997 (14)                                                        |
| b (Å)                                     | 7.894 (16)                                                       | 11.618(2)                                                         | 25.358(5)                                                         |
| c (Å)                                     | 20.331(4)                                                        | 12.591(3)                                                         | 25.482(5)                                                         |
| $\alpha$ (°)                              | 90                                                               | 97.81(3)                                                          | 90                                                                |
| $\beta$ (°)                               | 119.22(3)                                                        | 103.15(3)                                                         | 90                                                                |
| $\gamma$ (°)                              | 90                                                               | 93.34(3)                                                          | 90                                                                |
| V (Å <sup>3</sup> )                       | 4484.0(16)                                                       | 1265.0(4)                                                         | 4521.2 (155)                                                      |
| Z                                         | 8                                                                | 2                                                                 | 8                                                                 |
| $D_{\text{calcd.}}$ (g·cm <sup>-3</sup> ) | 1.863                                                            | 1.636                                                             | 1.578                                                             |
| Reflections collected                     | 18044 / 5342                                                     | 14223 / 5917                                                      | 17390 / 4184                                                      |
| /unique                                   |                                                                  |                                                                   |                                                                   |
| $\mu$ (mm <sup>-1</sup> )                 | 2.393                                                            | 2.487                                                             | 1.125                                                             |
| $F(000)$                                  | 2480                                                             | 628                                                               | 2192                                                              |
| $\theta$ (°)                              | 2.30-27.90                                                       | 1.68-27.84                                                        | 0.9254-0.87                                                       |
| GOF on $F^2$                              | 1.126                                                            | 1.135                                                             | 1.158                                                             |
| $R_I(I > 2\sigma(I))^a$                   | 0.0632                                                           | 0.0652                                                            | 0.0997                                                            |
| $wR_2(I > 2\sigma(I))^b$                  | 0.1108                                                           | 0.1437                                                            | 0.2434                                                            |

$$^a R_1 = \sum |F_o| - |F_c| / \sum |F_o|. \quad ^b wR_2 = [\sum w (F_o^2 - F_c^2)^2 / \sum w (F_o^2)^2]^{1/2}.$$

**Table S2.** Selected Bond Distances (Å) and Angles (deg) for **1-3**.

| Complex 1                                  |            |                    |          |
|--------------------------------------------|------------|--------------------|----------|
| Cu(1)-N(1)                                 | 1.979(4)   | C(12)-N(4)-Cu(1)#2 | 122.9(3) |
| Cu(1)-N(4)#1                               | 1.998(4)   | C(15)-N(4)-Cu(1)#2 | 119.6(3) |
| Cu(1)-I(1)                                 | 2.5602(9)  | C(4)-N(1)-Cu(1)    | 123.6(3) |
| N(1)-Cu(1)-N(4)#1                          | 126.48(17) | C(1)-N(1)-Cu(1)    | 119.3(3) |
| N(1)-Cu(1)-I(1)                            | 120.57(12) | C(15)-N(4)-Cu(1)#2 | 119.6(3) |
| N(4)#1-Cu(1)-I(1)                          | 109.56(12) | C(4)-N(1)-Cu(1)    | 123.6(3) |
| #1=-x+2, y-1, -z+3/2; #2=-x+2, y+1, -z+3/2 |            |                    |          |

| Complex 2                                                       |            |                     |            |
|-----------------------------------------------------------------|------------|---------------------|------------|
| Cu(1)-N(4)#1                                                    | 2.042(4)   | N(4)#1-Cu(1)-N(1)   | 119.20(16) |
| Cu(1)-N(1)                                                      | 2.047(4)   | N(4)#1-Cu(1)-N(6)#2 | 106.77(17) |
| Cu(1)-N(6)#2                                                    | 2.097(5)   | N(1)-Cu(1)-N(6)#2   | 109.05(17) |
| Cu(1)-Br(1)                                                     | 2.5025(11) | N(4)#1-Cu(1)-Br(1)  | 107.23(12) |
| N(4)-Cu(1)#3                                                    | 2.042(4)   | N(1)-Cu(1)-Br(1)    | 112.70(13) |
| N(6)-Cu(1)#4                                                    | 2.097(5)   | N(6)#2-Cu(1)-Br(1)  | 100.05(13) |
| C(10)-N(4)-Cu(1)#3                                              | 123.2(3)   | C(23)-N(1)-Cu(1)    | 118.4(3)   |
| C(9)-N(4)-Cu(1)#3                                               | 118.2(3)   | C(24)-N(1)-Cu(1)    | 123.8(3)   |
| C(16)-N(6)-Cu(1)#4                                              | 122.4(3)   | C(19)-N(2)-C(20)    | 125.9(4)   |
| C(15)-N(6)-Cu(1)#4                                              | 120.4(4)   |                     |            |
| #1=x+1, y-1, z; #2=x, y-1, z-1; #3=x-1, y+1, z; #4 x, y+1, z+1. |            |                     |            |

| Complex 3                                                                             |          |                     |          |
|---------------------------------------------------------------------------------------|----------|---------------------|----------|
| Cu(1)-N(4)#1                                                                          | 1.948(6) | N(4)#1-Cu(1)-N(1)   | 119.6(3) |
| Cu(1)-N(1)                                                                            | 1.970(5) | N(4)#1-Cu(1)-N(6)#2 | 118.4(2) |
| Cu(1)-N(6)#2                                                                          | 2.012(6) | N(1)-Cu(1)-N(6)#2   | 120.7(2) |
| N(4)-Cu(1)#3                                                                          | 1.948(6) | C(5)-N(1)-C(1)      | 118.4(6) |
| N(6)-Cu(1)#4                                                                          | 2.012(6) | C(5)-N(1)-Cu(1)     | 119.7(5) |
| C(14)-N(4)-Cu(1)#3                                                                    | 115.4(5) | C(1)-N(1)-Cu(1)     | 121.6(5) |
| C(18)-N(4)-Cu(1)#3                                                                    | 126.6(5) | C(6)-N(2)-C(4)      | 126.7(5) |
| C(24)-N(6)-Cu(1)#4                                                                    | 126.3(5) | C(21)-N(6)-Cu(1)#4  | 116.0(4) |
| #1=x,-y+1/2, z+1/2; #2=-x+5/2,-y+1, z+1/2; #3=x,-y+1/2, z-1/2; #4=-x+5/2,-y+1, z-1/2. |          |                     |          |

**Table S3.** Hydrogen Bonds of complexes **1-3**.

| Comple<br>x                                    | D-H $\cdots$ A              | d(D-H)<br>(Å) | d( H $\cdots$ A)<br>(Å) | d( D $\cdots$ A)<br>(Å) | <(D-H $\cdots$ A)<br>(deg) |
|------------------------------------------------|-----------------------------|---------------|-------------------------|-------------------------|----------------------------|
| <b>1</b>                                       | N(5)-H(5A) $\cdots$ O(2)#2  | 0.86          | 2.15                    | 2.983(5)                | 162.1                      |
| <b>2</b>                                       | N(3)-H(3) $\cdots$ Br(1)#1  | 0.86          | 2.76                    | 3.578(4)                | 160.2                      |
| <b>3</b>                                       | N(2)-H(2A) $\cdots$ Cl(1)#1 | 0.86          | 2.50                    | 3.234(5)                | 143.4                      |
|                                                | N(3)-H(3A) $\cdots$ Cl(1)#2 | 0.86          | 2.50                    | 3.326(5)                | 161.3                      |
|                                                | N(5)-H(5A) $\cdots$ Cl(1)#2 | 0.86          | 2.53                    | 3.333(5)                | 156.2                      |
| Symmetry codes: #1= -x+2,-y+1,-z; #2= x,y-1,z. |                             |               |                         |                         |                            |

#### 4. Additional structure figures of Cu-complexes

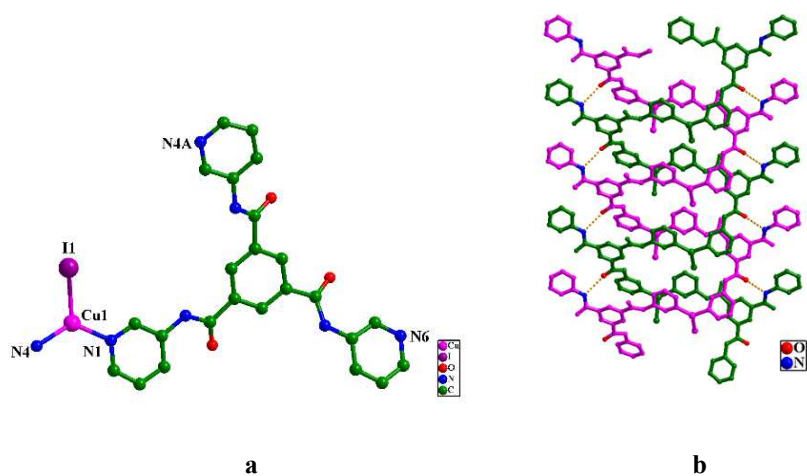

**Figure S1.** (a) Coordination environments of the Cu(I) ions in **1**. Hydrogen atoms are omitted for clarity; (b) Intermolecular hydrogen bonding interactions in **1**.

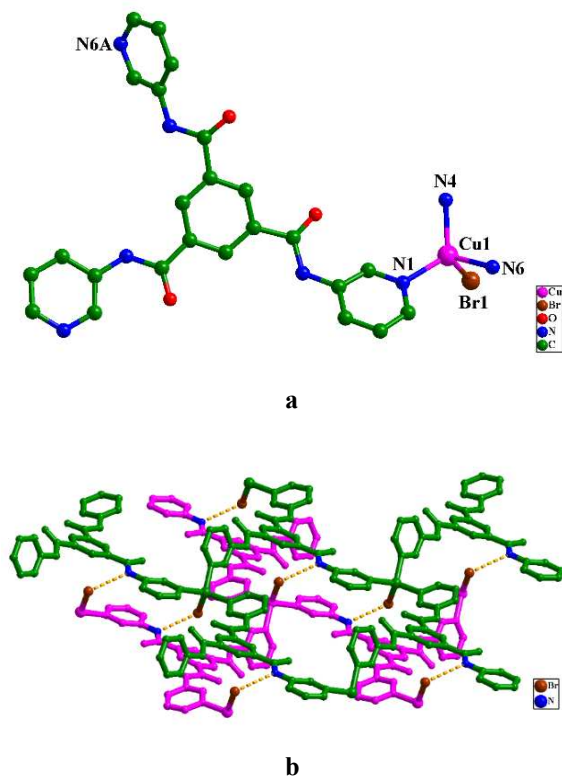



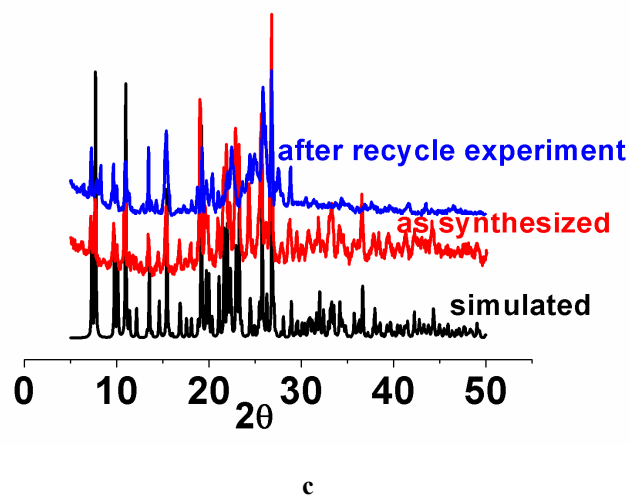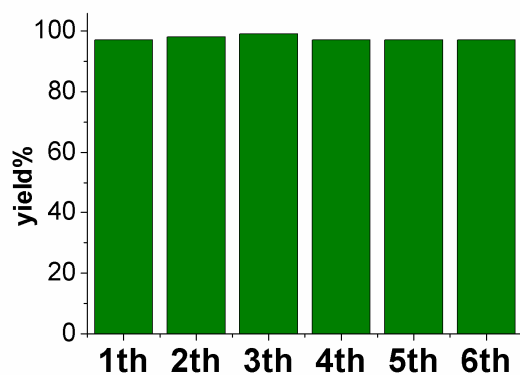

**Figure S2.** (a) Coordination environments of the Cu(I) ions in **2**. Hydrogen atoms are omitted for clarity; (b) Intermolecular hydrogen bonding interactions in **2**; (c) Recycling test for the conversion of alkanes into ketones with **2**; (d) Comparison of the PXRD patterns of **2** before and after recycles experiments.

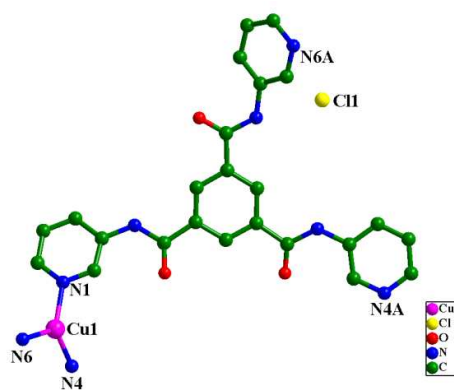

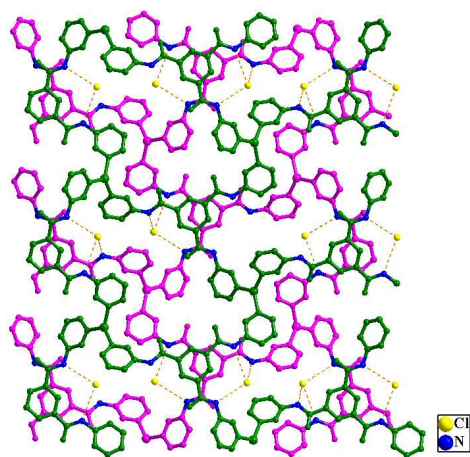

b

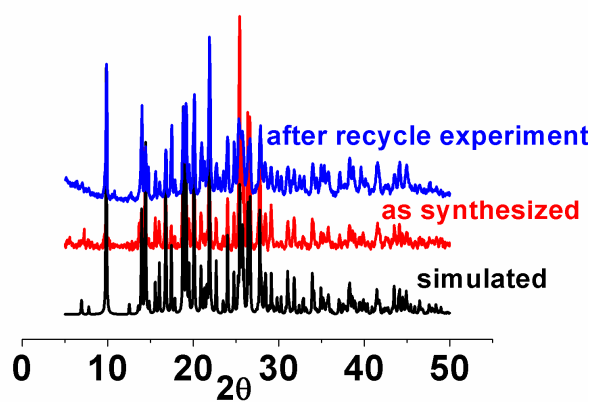

c

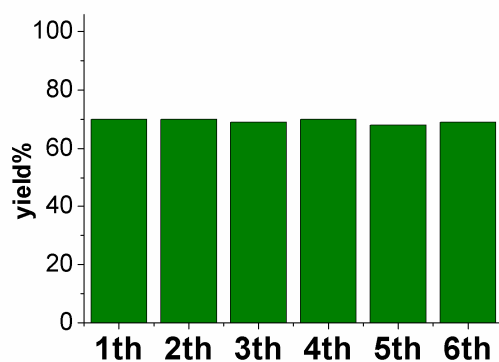

d

**Figure S3.** (a) Coordination environments of the Cu(I) ions in **3**. Hydrogen atoms are omitted for clarity; (b) Intermolecular hydrogen bonding interactions in **3**; (c) Recycling test for the conversion of alkanes into ketones with **3**; (d) Comparison of the PXRD patterns of **3** before and after recycles experiments.

5. Spectral copies of  $^1\text{H}$  NMR of compounds obtained in this study.

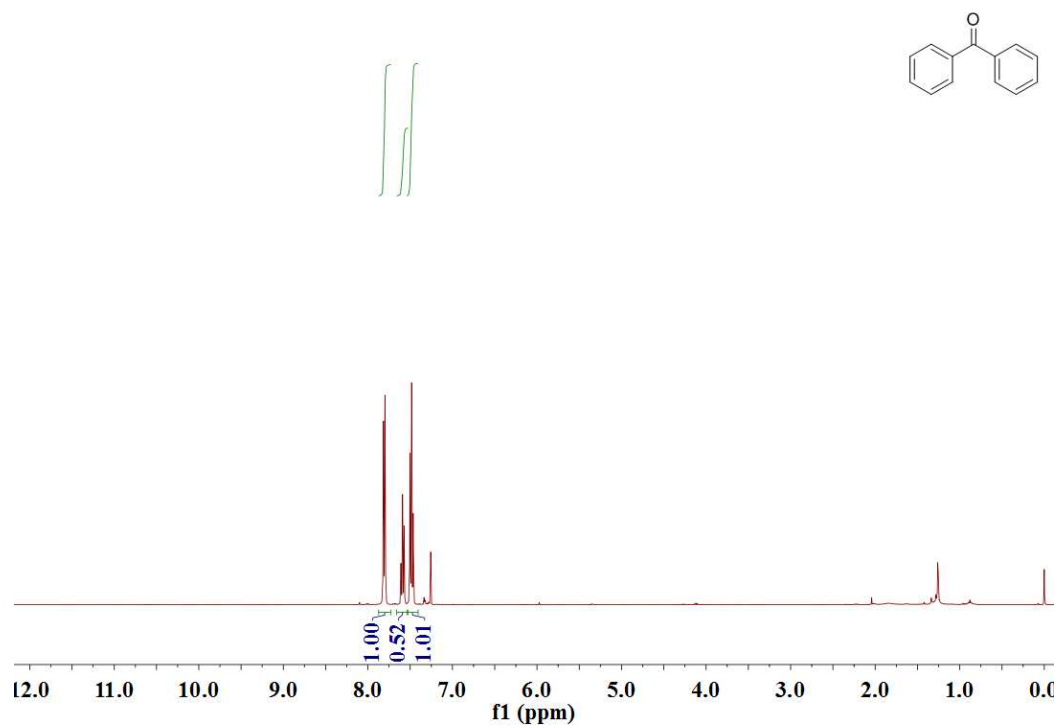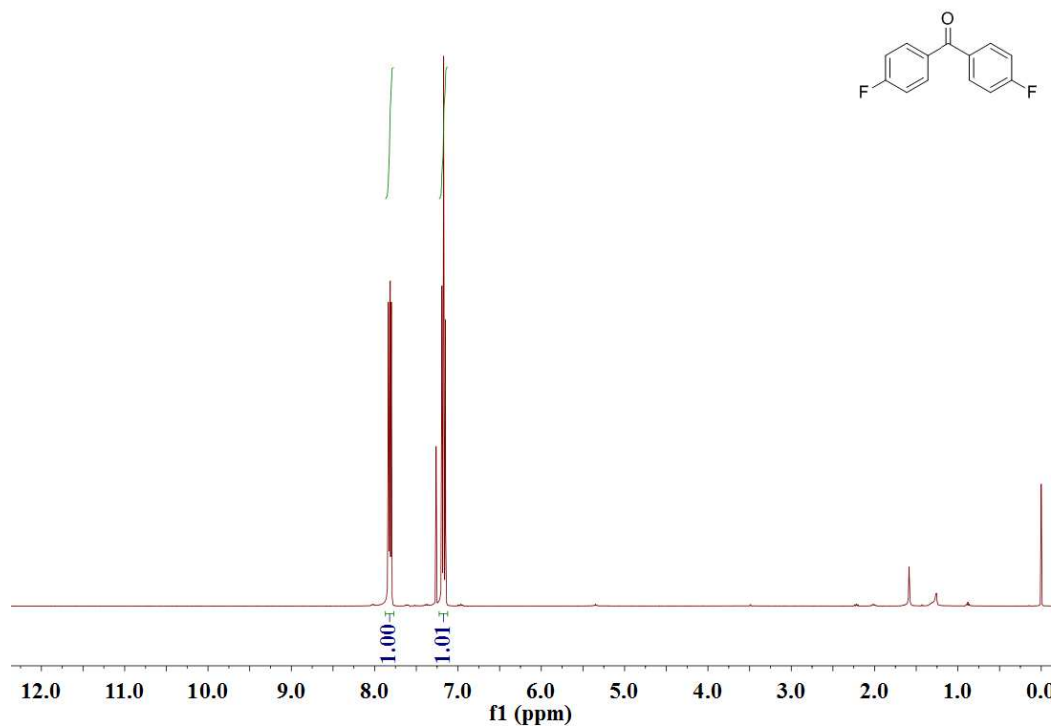

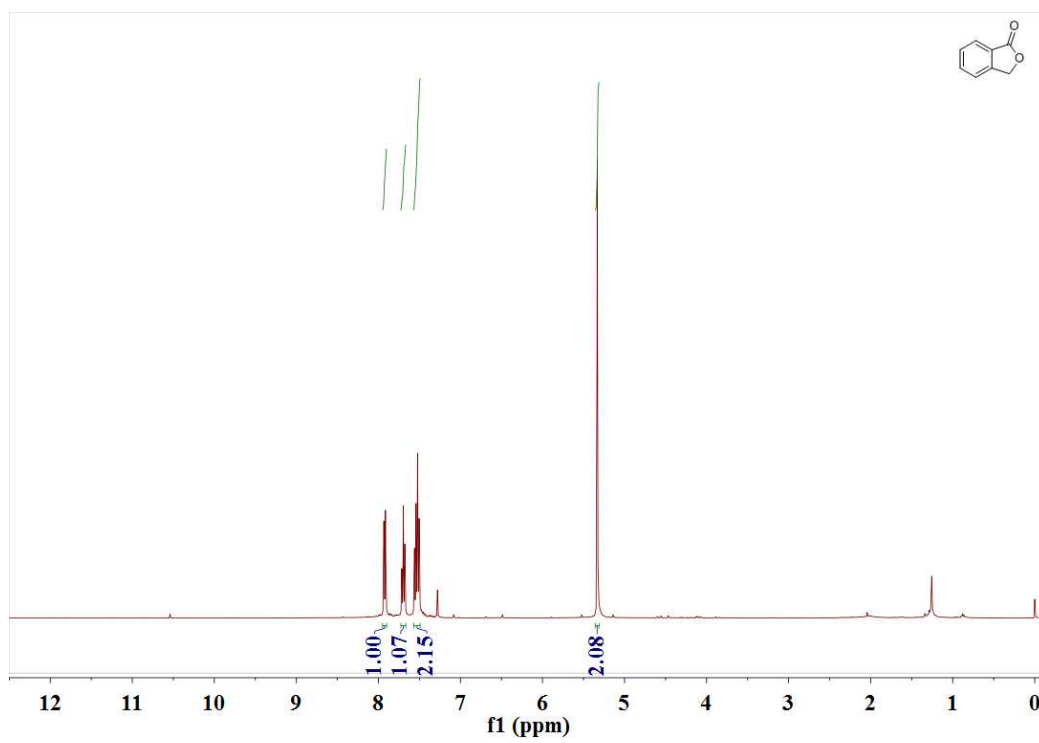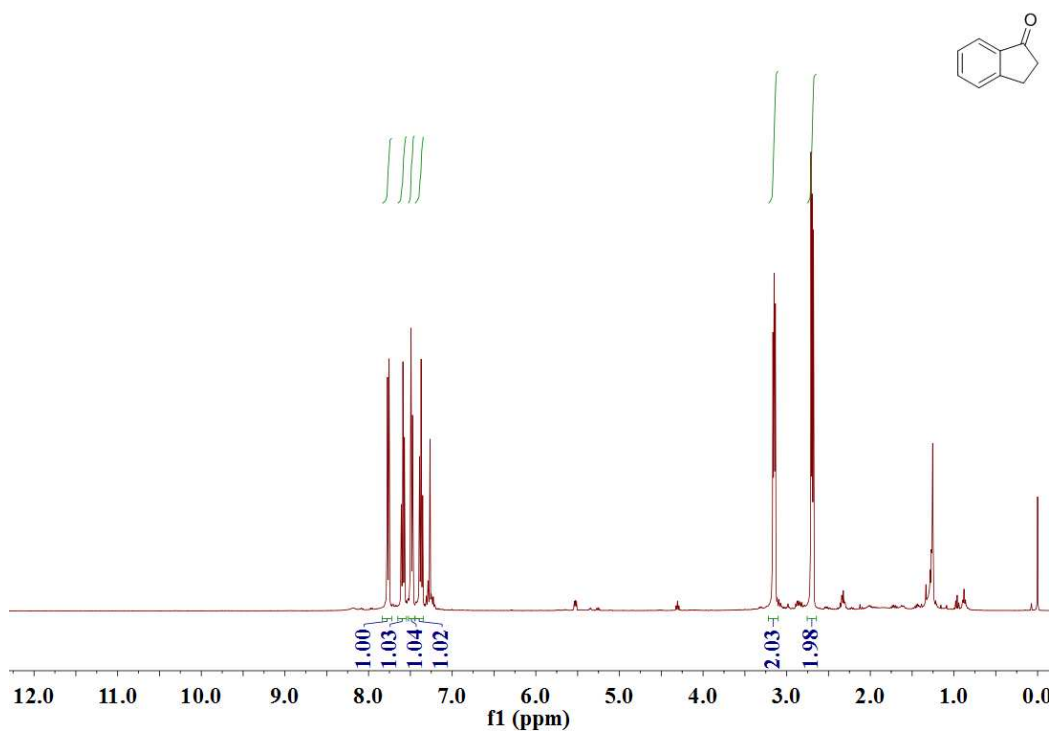

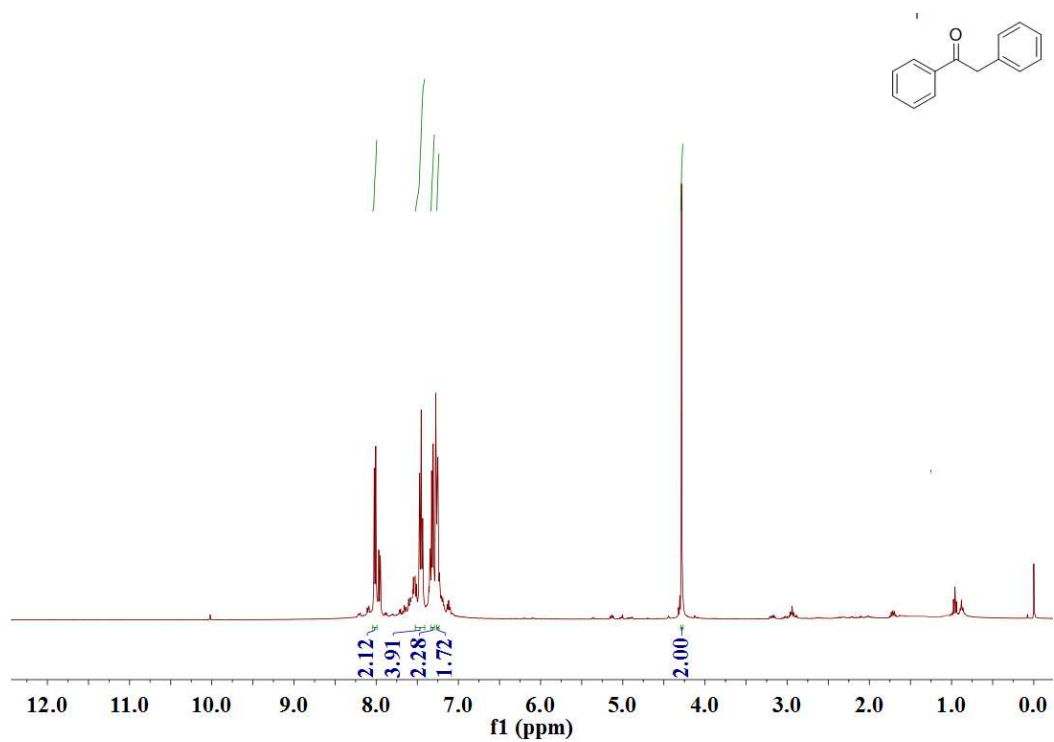

## 7. References.

- (1) Hossain, M. M.; Shyu, S. G. Biphasic copper-catalyzed C-H bond activation of arylalkanes to ketones with tert-butyl hydroperoxide in water at room temperature. *Tetrahedron*. **2016**, *72*, 4252-4257
- (2) Verma, S.; Baig, R. B. N.; Nadagouda, N. N.; Varma, R. S. Photocatalytic C-H Activation of Hydrocarbons over VO@g-C<sub>3</sub>N<sub>4</sub>. *ACS Sustainable Chem. Eng.* **2016**, *4*, 2333-2336.
- (3) Miao C.; Zhao, H.; Zhao, Q.; Xia, C.; Sun, W. NHPI and ferric nitrate: a mild and selective system for aerobic oxidation of benzylic methylenes. *Catal. Sci. Technol.* **2016**, *6*, 1378-1383
- (4) Sheldrick, G. M. A short history of *SHELX*. *Acta Crystallogr. Sect. A: Found. Crystallogr.* **2008**, *A64*, 112-122.
